# Supplementary material for: Next-Generation Sequencing-Based Monitoring of Intestinal Bacteria and Bacteriophages Following Fecal Microbiota Transplantation in Inflammatory Bowel Diseases
Source: MDPI journal article supplement (doi:10.3390/pathogens12121438), 2023-12-11
Supplement: s1 [file s1]

**Table S1.** List of primers for intestinal dsDNA viruses in the studied panel NGS panel.

| Name of virus                                                    | Strain                            | Primer names | Primer sequences (5'-3')           | Length of PCR product | Reference                                  |
|------------------------------------------------------------------|-----------------------------------|--------------|------------------------------------|-----------------------|--------------------------------------------|
| <b>Bacteriophages</b>                                            |                                   |              |                                    |                       |                                            |
| <i>E.coli</i> X52686.1 Bacteriophage T4 rIIA gene and ORF rIIA.1 | T4                                | T4F          | CCATCCATAGAGAAAA-TATCAGAACGA       | 100                   | Ninove et al., 2011                        |
|                                                                  |                                   | T4R          | TAAA-TAATTCCTCTTTTCCCAGCG          |                       |                                            |
| <i>E.coli</i>                                                    | MS2                               | MS2F         | CTCTGAGAGCGGCTCTATTGGT             | 100                   | Ninove et al., 2011                        |
|                                                                  |                                   | MS2R         | GTTCCCTACAAC-GAGCCTAAATTC          |                       |                                            |
| <i>Klebsiella pneumonia</i> phage                                | kpv71 KU666550 (Autographviridae) | 71F_NcoI     | AGTGCCCATGGCATTAAATT-AGATTAGTAGCTC |                       | Solovieva et al., 2018; Knecht et al, 2019 |
|                                                                  |                                   | 71R_XhoI     | CATACTCGAGATACAC-CTCCCAGGCTACCTG   |                       |                                            |
|                                                                  | Kpv74                             | 74F_NcoI     | GAATCCATGGCACTAGTAGAT-TTAGTGAGG    |                       | Solovieva et al., 2018 A.Latka, 2019       |
|                                                                  |                                   | 74R_XhoI     | ATTACTCGAGCACATT-GCACAGCAAGTACG    |                       |                                            |
| <i>Salmonella enteric</i> phages                                 | SEN22                             | F4c5-F       | CAACTTGC GACTGCTCTTTG              | 474                   | Mikalová et al., 2017                      |
|                                                                  |                                   | F4c5-R       | CGAAGGAAGCGTTAGACCTG               |                       |                                            |
|                                                                  | SEN2                              | F3c7-F       | GTTGGGTGGAAGAAGCTGAA               | 413                   | Mikalová et al., 2017                      |
|                                                                  |                                   | F3c7-R       | AGCATCTGGCCCTGTATCTG               |                       |                                            |
|                                                                  | SEN8                              | F20c3-F      | TTCAGTG GTTGGTTC CATGA             | 471                   | Mikalová et al., 2017                      |
|                                                                  |                                   | F20c3-R      | GCGTTAAGAAGCCAGAAACG               |                       |                                            |
|                                                                  | SEN8                              | F20c5-F      | TTATTTGCTGCGCTGACATC               | 494                   | Mikalová et al., 2017                      |
|                                                                  |                                   | F20c5-R      | TCAGAAGAAGGCCTGGCTAA               |                       |                                            |
|                                                                  | SEN23                             | F6c1-F       | GGCCGATCAGTTGCTTAAAA               | 232                   | Mikalová et al., 2017                      |
|                                                                  |                                   | F6c1-R       | CTCATGCCCCAACATTTTCT               |                       |                                            |
|                                                                  | SEN4                              | F9c2-F       | GCCGTCTGATAACCCAGAAA               | 456                   | Mikalová et al., 2017                      |
|                                                                  |                                   | F9c2-R       | CGTTTTCCAGATCAGCCTGT               |                       |                                            |
|                                                                  | SEN34                             | F38c2-F      | AAGTGGGGA ACTGCTGAAGA              | 487                   | Mikalová et al., 2017                      |
|                                                                  |                                   | F38c2-R      | AACGCTGCCATAAGCTGACT               |                       |                                            |
|                                                                  | SEN1                              | F1c3-F       | AAAGGCCG GTTAGGTAGCTC              | 456                   | Mikalová et al., 2017                      |
|                                                                  |                                   | F1c3-R       | ATCGCTCGCATGTTTAACG                |                       |                                            |
|                                                                  | SEN22                             | F4c4-F       | AATGGATGCAGTCAGGGAAG               | 421                   | Mikalová et al., 2017                      |
|                                                                  |                                   | F4c4-R       | GTCAATCATCGCGTTTTCT                |                       |                                            |
|                                                                  | SEN5                              | F10c1-F      | TTCGCAAATGAAATCGAGTG               | 443                   | Mikalová et al., 2017                      |
|                                                                  |                                   | F10c1-R      | ATCGGCAACTTACCGTCATC               |                       |                                            |
|                                                                  | SEN23                             | F6c4-F       | GTTGTT CAGGCC GTTGATTT             | 284                   | Mikalová et al., 2017                      |
|                                                                  |                                   | F6c4-R       | GTACATCGCCTGAAGGGAGA               |                       |                                            |
|                                                                  | SEN34                             | F38c1-F      | GTTTATGGCGCTGAAAAGGA               | 457                   | Mikalová et al., 2017                      |
|                                                                  |                                   | F38c1-R      | GTTGTT CAGGCC GTTGATTT             |                       |                                            |
| <i>Bacteroides</i>                                               | CrAssphage                        | CrassPhF     | AGACGCGATGAAGAACTGCT               | 590                   | Yangpeng Li et al., 2021                   |
|                                                                  |                                   | CrassPhR     | CCATCGGGAGCAGTAAGACC               | 500                   |                                            |
|                                                                  |                                   | CrPhPolF     | CGGCGGGTTAATCAAAA-TAGAA            | 500                   | Yangpeng Li et al., 2021                   |
|                                                                  |                                   | CrPhPolR     | GCGGAGAACCCCATTTATTAA-TAAG         |                       |                                            |

## Eukaryotic cell viruses

|                                                                                         |                      |                                        |                                            |                   |                                                 |
|-----------------------------------------------------------------------------------------|----------------------|----------------------------------------|--------------------------------------------|-------------------|-------------------------------------------------|
| Cytomegalovirus (DNA)                                                                   | AD169, Toledo, Towne | UL55N_F                                | GGA TCT GGT GCC TGG TAG TC                 | 250               | Grosjean et al., 2009                           |
|                                                                                         |                      | UL55N_R                                | CGA ATA AGA TCC GTA CCC TG                 |                   |                                                 |
|                                                                                         | AD169, Toledo, Towne | UL55C_F                                | TGT TCT GGC AAG GTA TCA                    | 250               |                                                 |
|                                                                                         |                      | UL55C_R                                | AGC A<br>GTG AAC TGC AGC TGG GCG TA        |                   |                                                 |
|                                                                                         | AD169                | UL73_F                                 | TTC GGT CGG TCA ACA TCG                    | 361               |                                                 |
|                                                                                         |                      | UL73_R                                 | TAA G<br>GGT GGT TGC AGT AAA GTT<br>CTG GA |                   |                                                 |
|                                                                                         | Toledo               | UL75_F                                 | TCC TGG GAT CCT TTC TCT CCT                | 429               |                                                 |
|                                                                                         |                      | UL75_R                                 | TCT<br>ATG GGT CTC CCG TAG GTG TTG         |                   |                                                 |
| Varicella Zoster (DNA) Human herpesvirus 3 (VZV, strain Dumas) complete genome - X04370 | Dumas, Oka           | vzv49f                                 | TGAGCAACTTGATCCGTGTC                       | 347               | Jin et al., 2017                                |
|                                                                                         |                      | vzv49r                                 | CCTCGCCATAAAGCCACTAC                       |                   |                                                 |
|                                                                                         |                      | vzv62f                                 | ACAAACACAGGGGTTGTTCG                       | 339               |                                                 |
|                                                                                         |                      | vzv62r                                 | GCGTTTTATTACTGTTCGACC                      |                   |                                                 |
|                                                                                         |                      | vzv52f                                 | CGGTGGACACACAGAAAGAG                       | 360               |                                                 |
|                                                                                         |                      | vzv52r                                 | GCCCTGAACCAAGTTCTACCA                      |                   |                                                 |
|                                                                                         |                      | vzv11f                                 | ACCCACCATCATTGAGTCC                        | 350               |                                                 |
|                                                                                         |                      | vzv11r                                 | GCCGTTTGAGACCGATGATA                       |                   |                                                 |
| Adenovirus                                                                              | AdV ACF F1           | GGT CTG GTG CAA TTC GCC                | 135                                        | Ebner et al, 2005 |                                                 |
|                                                                                         | AdV ACF R1           | CAC GGG CAC AAA ACG CA                 |                                            |                   |                                                 |
|                                                                                         | AdV ACF F2           | ACC TGG GCC AAA ACC TTC TC             | 75                                         |                   |                                                 |
|                                                                                         | AdV ACF R2           | CGT CCA TGG GAT CCA CCT C              |                                            |                   |                                                 |
|                                                                                         | AdV ACF F3           | CCC GTG TTT GAC AAC GAA GG             | 112                                        |                   |                                                 |
|                                                                                         | AdV ACF R3           | TTA GAG CTA GGC ATA AAT<br>TCT ACA GCA |                                            |                   |                                                 |
|                                                                                         | AdV BDE_F            | ACA TGC ACA TCG CCG G                  | 143                                        |                   |                                                 |
|                                                                                         | AdV BDE_R            | CGG TCS GTG GTC ACA TC                 |                                            |                   |                                                 |
| Adenovirus                                                                              | Hexon gene           | ADHEX2F1                               | AACACCTACGAC-TACATGAATGG                   | 133-155           | Ylihäsilä et al., 2013<br>Ebner K, et al., 2005 |
|                                                                                         |                      | ADHEX2F2                               |                                            | 130-155           |                                                 |
|                                                                                         |                      | ADHEX2F3                               | AAAAACACCTACGAC-TACATGAACGG                |                   |                                                 |
|                                                                                         |                      | Adhex1R                                | AACACCTACGATTA-TATGAACAAGC                 | 133-157           |                                                 |
|                                                                                         |                      | Adhex1R                                | ACATCCTTCCTGAAGTTCCA                       | 385-404           |                                                 |

## Sources:

Ninove L, Nougairède A, Gazin C, Thirion L, Delogu I, Zandotti C, Charrel RN, De Lamballerie X. RNA and DNA bacteriophages as molecular diagnosis controls in clinical virology: a comprehensive study of more than 45,000 routine PCR tests. *PLoS One*. 2011;6(2):e16142. doi: 10.1371/journal.pone.0016142.

Solovieva EV, Myakinina VP, Kislichkina AA, Krasilnikova VM, Verevkin VV, Mochalov VV, Lev AI, Fursova NK, Volozhantsev NV. Comparative genome analysis of novel Podoviruses lytic for hypermucoviscous *Klebsiella pneumoniae* of K1, K2, and K57 capsular types. *Virus Res*. 2018;243:10-18. doi: 10.1016/j.virusres.2017.09.026.

Latka A, Lemire S, Grimon D, Dams D, Maciejewska B, Lu T, Drulis-Kawa Z, Briers Y. Engineering the Modular Receptor-Binding Proteins of *Klebsiella* Phages Switches Their Capsule Serotype Specificity. *mBio*. 2021 May 4;12(3):e00455-21. doi: 10.1128/mBio.00455-21.

Mikalová L, Bosák J, Hříbková H, Dědičová D, Benada O, Šmarda J, Šmajs D. Novel Temperate Phages of *Salmonella enterica* subsp. *salamae* and subsp. *diarizonae* and Their Activity against Pathogenic *S. enterica* subsp. *enterica* Isolates. *PLoS One*. 2017;12(1):e0170734. doi: 10.1371/journal.pone.0170734.

Li Y, Gordon E, Shean RC, Idle A, Deng X, Greninger AL, Delwart E. CrAssphage and its bacterial host in cat feces. *Sci Rep*. 2021;11(1):815. doi: 10.1038/s41598-020-80076-9.

Grosjean J, Hantz S, Cotin S, Baclet MC, Mengelle C, Trapes L, Virey B, Undreiner F, Brosset P, Pasquier C, Denis F, Alain S. Direct genotyping of cytomegalovirus envelope glycoproteins from toddler's saliva samples. *J Clin Virol*. 2009; 46 Suppl 4:S43-8. doi: 10.1016/j.jcv.2009.08.018.

Jin L, Xu S, Maple PAC, Xu W, Brown KE. Differentiation between wild-type and vaccines strains of varicella zoster virus (VZV) based on four single nucleotide polymorphisms. *Epidemiol Infect*. 2017; 145(12):2618-2625. doi: 10.1017/S0950268817001509.

Ebner K, Suda M, Watzinger F, Lion T. Molecular detection and quantitative analysis of the entire spectrum of human adenoviruses by a two-reaction real-time PCR assay. *J Clin Microbiol*. 2005; 43(7):3049-53. doi: 10.1128/JCM.43.7.3049-3053.2005.

Ylihäsälä M, Harju E, Arppe R, Hattara L, Hölsä J, Saviranta P, Soukka T, Waris M. Genotyping of clinically relevant human adenoviruses by array-in-well hybridization assay. *Clin Microbiol Infection*. 2013; 19(6): 551-557. doi: 10.1111/j.1469-0691.2012.03926.x
